# Supplementary material
Source: PubMed Central journal article supplement (PMC4617358)
Supplement: supp_M052845_jlr.M052845-1.pdf [file supp_M052845_jlr.M052845-1.pdf]

## Lxr-driven enterocyte lipid droplet formation delays transport of ingested lipids

Lourdes Cruz-Garcia, Amnon Schlegel

### Supplementary Materials

### Supplementary Figures

A

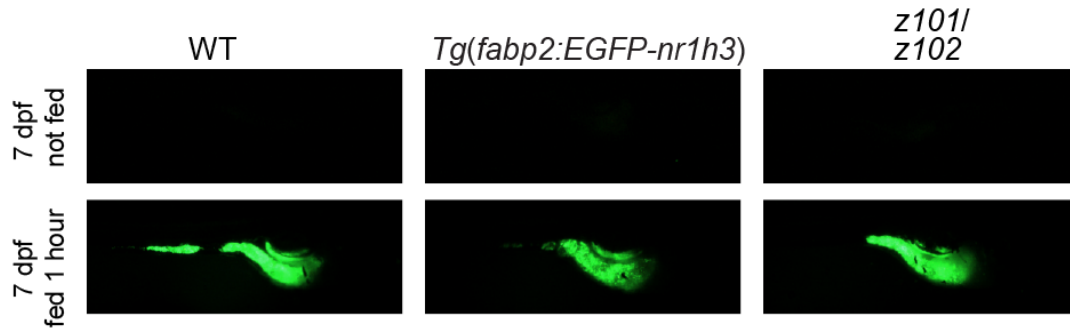

B

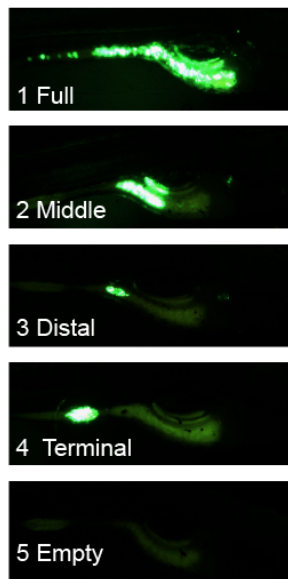

C

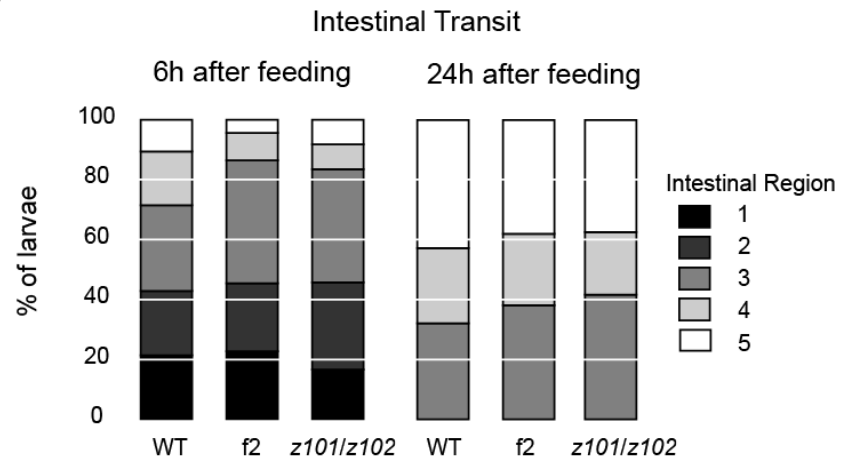

**Supplementary Figure 1. Intestinal transit is not affected by Lxr.** (A) 7 dpf larvae were fed a meal spiked with non-absorbable fluorescent beads for 1h. (B and C) The location of the beads was monitored 6 and 24 h after feeding (n= 25-28). No differences in intestinal transit were found among the 3 genotypes. WT, wild-type; *z101/z102*, *nr1h3*<sup>*z101/z102*</sup>; f2, *Tg(fabp2:EGFP-nr1h3)*.

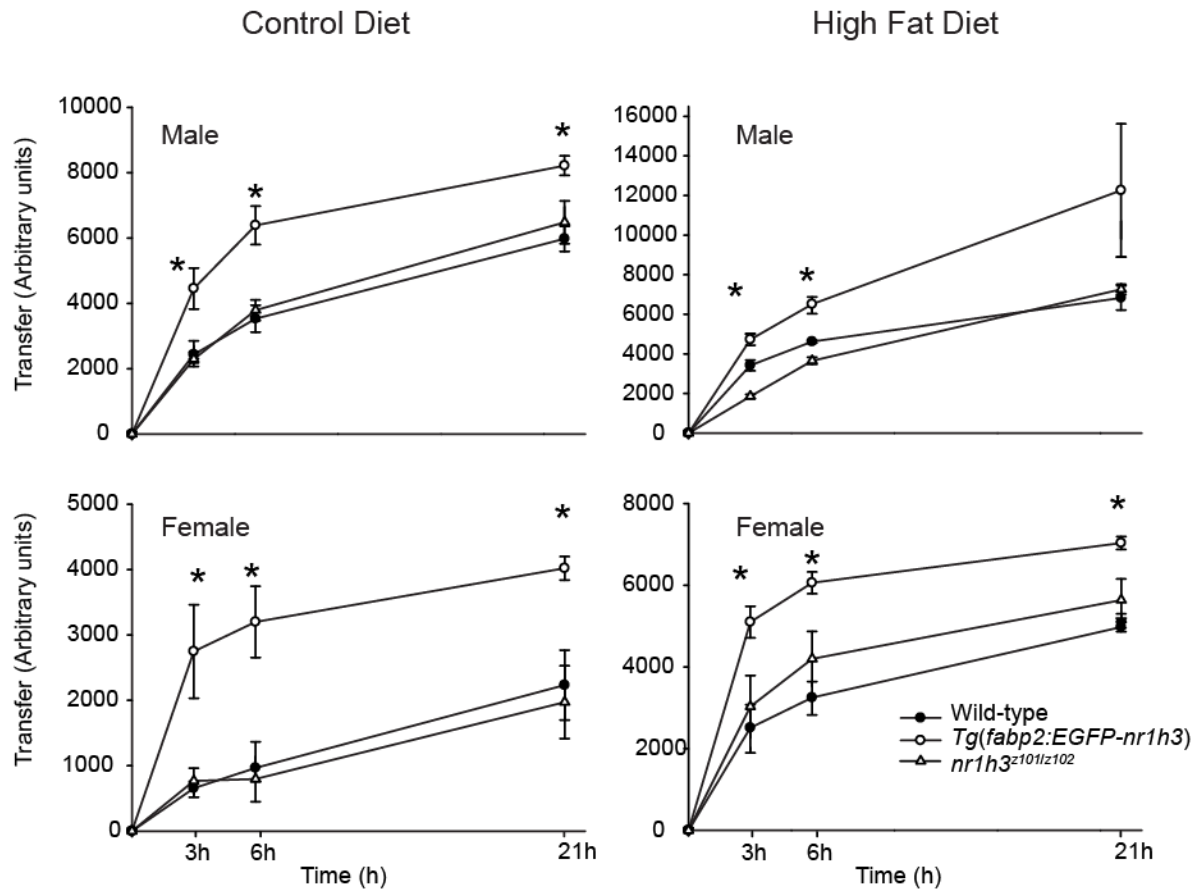

**Supplementary Figure 2. Intestinal Mtp activity is greater in *Tg(fabp2:nr1h3)* animals.** Mtp activity was measured in anterior intestines from animals fed a control or high fat diet (\*) P < 0.05 for each genotype compared to wild-type (n=4).

**A**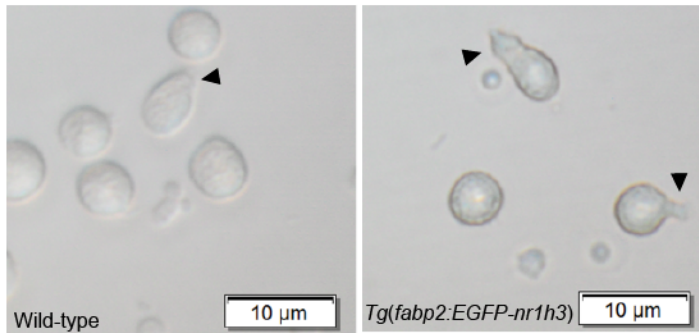**B**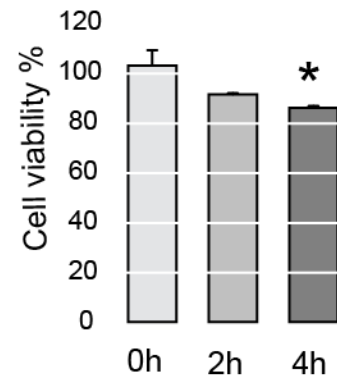**C**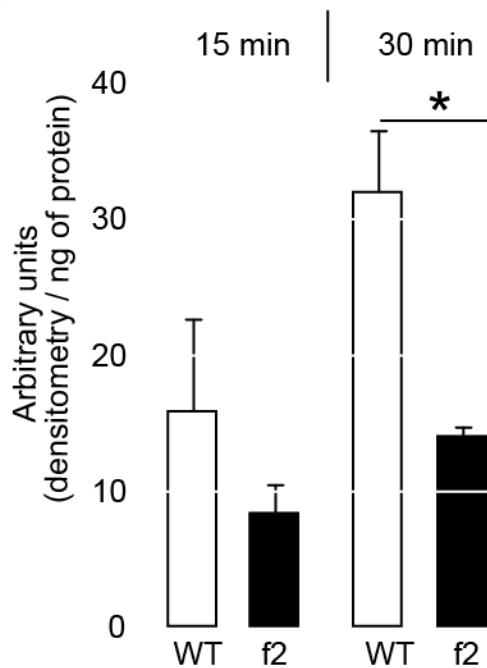**D**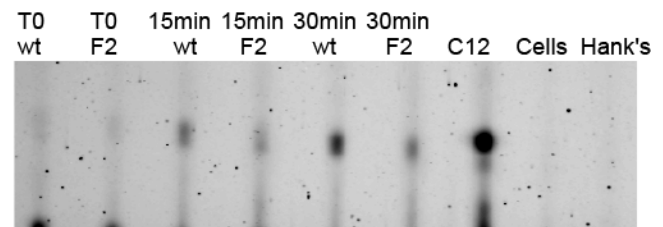

**Supplementary Figure 3. Transgenic over-expression of *Lxra* in enterocytes decreases uptake of fatty acids.** (A) Enterocytes were isolated from wild-type and *Tg(fabp2a:EGFP:nr1h3)* ('F2') animals. Arrowheads point to the apical brush border. (B) Viability of the isolated cells. (C and D) The isolated enterocytes were incubated with a BODIPY FL C<sub>12</sub> for 15 and 30 min, and the lipids were extracted and run on a TLC plate, and quantified. (\*)  $P < 0.05$  compared to wild-type (n=3 pools of three wells each).

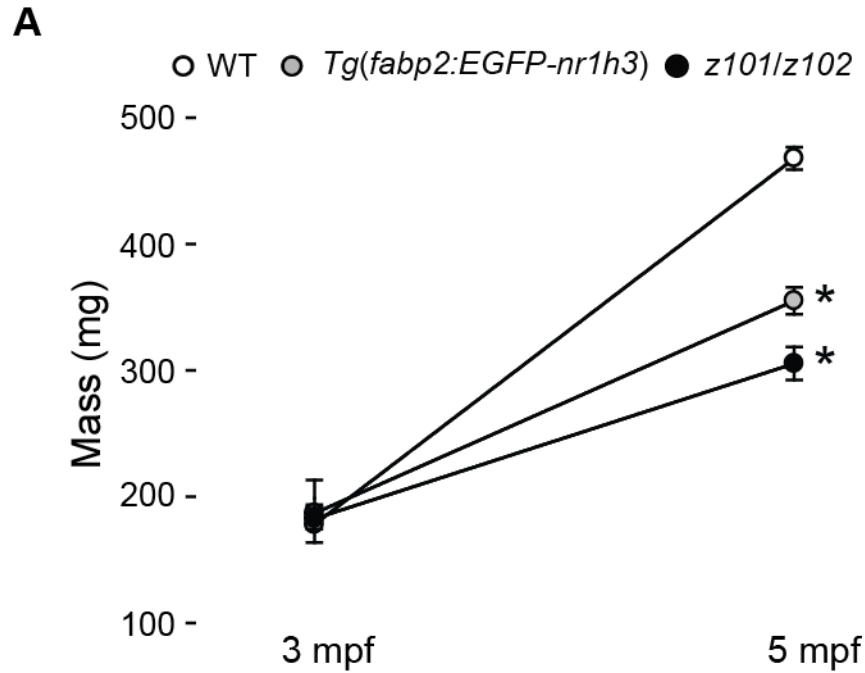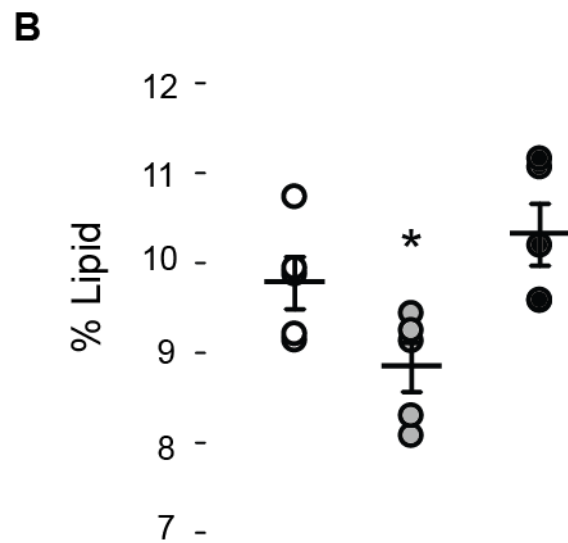

**Supplementary Figure 4. Mass and body composition (% lipid) analysis of adults fed the control diet for two months.** (A) Masses of animals in the indicated cohorts were measured at the start and conclusion of a two month protocol of feeding the control diet shown in Table S1 (B) Body composition was measured at the conclusion of the feeding period. Note *Tg(fabp2:EGFP-nr1h3)* adults had lower masses at the end of the study. (\*)  $P < 0.05$ .

## Supplementary Tables

**Supplementary Table 1.** Composition of define diets used in this study.

| <b>Ingredient</b>        | <b>Control Diet</b> | <b>High Fat Diet</b> | <b>Vendor</b>       |
|--------------------------|---------------------|----------------------|---------------------|
| Corn Dextrin             | 7                   | 2.67                 | Sigma-Aldrich       |
| Fish Meal                | 30                  | 23.56                | The Scoular Company |
| Casein                   | 18.75               | 13.5                 | Sigma-Aldrich       |
| Wheat Gluten             | 12                  | 9                    | Red Mill            |
| Cod Liver                | 0.4                 | 7                    | Gateway Products    |
| Flaxseed Oil             | 2                   | 12.5                 | Now Foods           |
| Sunflower Oil            | 0.4                 | 7                    | Bizim Sunflower Oil |
| Dried Egg Yolk           | 6                   | 10                   | Sigma-Aldrich       |
| Gelatin                  | 4                   | 4                    | Sigma-Aldrich       |
| Carboxymethylcellulose   | 2                   | 2                    | Acros Organics      |
| Alpha cellulose          | 8.68                | 0                    | Sigma-Aldrich       |
| Vitamin Mix <sup>a</sup> | 3.81                | 3.81                 | Sigma-Aldrich       |
| Mineral Mix <sup>b</sup> | 2.5                 | 2.5                  |                     |
| Canthaxanthin            | 2.3                 | 2.3                  | LTK Laboratories    |
| Betaine <sup>a</sup>     | 0.15                | 0.15                 | Sigma-Aldrich       |
| Butylated Hydroxytoluene | 0.01                | 0.10                 | Alfa Aesar          |
| Energy (cal/ 100 g)      | 318.4               | 425.7                |                     |
| Crude Protein (%)        | 51.2                | 39.9                 |                     |
| Crude Lipid (%)          | 10.2                | 31.1                 |                     |
| Total Cholesterol (%)    | 0.34                | 0.38                 |                     |
| Ash (%)                  | 10.4                | 8.8                  |                     |

- a. Composition: thiamine hydrochloride, 9 mg/kg; riboflavin, 9 mg/kg; pyridoxine hydrochloride, 10.5 mg/kg; nicotinic acid, 45 mg/kg; D-calcium pantothenate, 24 mg/kg; folic acid, 3 mg/kg; D-biotin, 0.3 mg/kg; cyanocobalamin, 0.015 mg/kg; retinyl palmitate, 24 mg/kg; DL-tocopherol acetate, 300 mg/kg; cholecalciferol, 3.75 mg/kg; menaquinone, 0.075 mg/kg; sucrose, 14.55 g/kg; phosphatidyl choline, 19 g/kg; choline chloride, 1.8 g/kg; sodium ascorbyl phosphate, 0.3 g/kg; inositol, 2 g/kg;
- b. Calcium phosphate dibasic, 7.5 g/kg; sodium chloride, 1.11 g/kg; potassium citrate, 3.3 g/kg; potassium sulphate, 0.78 g/kg; magnesium oxide, 0.36 g/kg; manganese carbonate 52.5 mg/kg; ferric citrate, 90 mg/kg; zinc carbonate, 24 mg/kg; copper carbonate, 4.5 mg/kg; sucrose, 1.77 g/kg; potassium phosphate 10 g/kg.

**Supplementary Table 2.** qPCR primer sequences.

| <b>Gene</b>    | <b>Protein</b>                                                     | <b>Accession number</b> | <b>Primers 5' to 3'</b>                         |
|----------------|--------------------------------------------------------------------|-------------------------|-------------------------------------------------|
| <i>abcg5</i>   | <i>ATP-binding cassette, sub-family G, member 5</i>                | NM_001128690.1          | TCCATGAAGGATGTTGTCCA<br>AGATCCCACCAGGGTCCTAC    |
| <i>abcg8</i>   | <i>ATP-binding cassette, sub-family G, member 8</i>                | XM_005156538.1          | CAGCAATAAGCAGACGGTCA<br>TTCCCGTTGATCAGGATCTC    |
| <i>acs13a</i>  | <i>acyl-CoA synthetase long-chain family member 3a</i>             | XM_005159236.1          | CAAGCTCGTTGAGGATGACA<br>TCCTCTGCTTCCCTTCTTGA    |
| <i>acs13b</i>  | <i>acyl-CoA synthetase long-chain family member 3b</i>             | XM_005163548.1          | CTGGCTCAGAGGTTTGAAG<br>CAGGTCTTTGCTTGTGACGA     |
| <i>acs15</i>   | <i>acyl-CoA synthetase long-chain family member 5</i>              | NM_001004599.1          | GCGTCAAAGGGACAAATGTT<br>CCTGGGCCAGTTTGAAGATA    |
| <i>apoa1a</i>  | <i>apolipoprotein A-Ia</i>                                         | NM_131128.1             | CTAAGCTGACCGAGCGTCTT<br>ATGTGGTCTCACGTTCTCC     |
| <i>apoa1b</i>  | <i>apolipoprotein A-Ib</i>                                         | NM_001100144.2          | GCCCTACGTCCAGGAGTACA<br>TTACTCCTTGCTGGCGAACT    |
| <i>apoa4</i>   | <i>apolipoprotein A-IV</i>                                         | NM_001079861.1          | TGCCAGGCCAACCTATTCTA<br>TTCAGTGGCCATATCAGCAC    |
| <i>apoba</i>   | <i>apolipoprotein Ba</i>                                           | XM_689735.6             | TGACCTCAAGCAGTCACTC<br>GGGGAAAACCAGCACTTGTA     |
| <i>apobb</i>   | <i>apolipoprotein Bb</i>                                           | XM_005160629.1          | GCTTGAAGGAACCAGCAGTC<br>AGTTGGTGGTTGGCATTAGC    |
| <i>cd36</i>    | <i>CD36 antigen</i>                                                | NM_001002363.1          | ATGAGACGGCCAAAATGTTT<br>ATTCGTTTTTGACGGTTTTCG   |
| <i>cyp7a1a</i> | <i>cytochrome P450, family 7, subfamily A, polypeptide 1a</i>      | NM_201173.1             | GCAGGCGTGCCAATGTG<br>CAGCTCGTTGAAGGTAGATAGTGTGT |
| <i>dagt2</i>   | <i>diacylglycerol O-acyltransferase 2</i>                          | XM_005172674.1          | CATGGCATCTTGTTTTGG<br>TCGGTTTACTGGCAGATTC       |
| <i>mtp</i>     | <i>microsomal triglyceride transfer protein</i>                    | NM_212970.1             | CTCAGCTGGTGGATGCAGTA<br>CAGGATTGAAGCATGGACT     |
| <i>slc27a4</i> | <i>solute carrier family 27 (fatty acid transporter), member 4</i> | NM_001017737.1          | GCCCAGGATGCTTCAAAAA<br>TCTTTCATGTCCAGCAGTCG     |
| <i>rplp0</i>   | <i>ribosomal protein large P0</i>                                  | XM_005165011.1          | CTGAACATCTCGCCCTTCTC<br>TAGCCGATCTGCAGACACAC    |
